# Supplementary material
Source: MDPI journal article supplement (https://www.mdpi.com/2311-7524/9/1/23)
Supplement: s1 [file s1]

**Supplementary materials****Title:**

Cucumber strigolactone receptor CsDAD2 and GA<sub>3</sub> interact to regulate shoot branching in *Arabidopsis thaliana* L.

**Authors:**

Yaoliang Cao, Yanlong Dong, Runming Zhang, Qian Li, Ruonan Peng, Chao Chen, Mengdi Lu, Xiaoxia Jin

**Journal:**

Horticulturae

**Corresponding author:**

Xiaoxia Jin

“Plant Biology” Key Laboratories of Universities in Heilongjiang Province, College of Life Science and Technology, Harbin Normal University, Harbin, 150025, China

E-mail:

xiaoxia6195@126.com

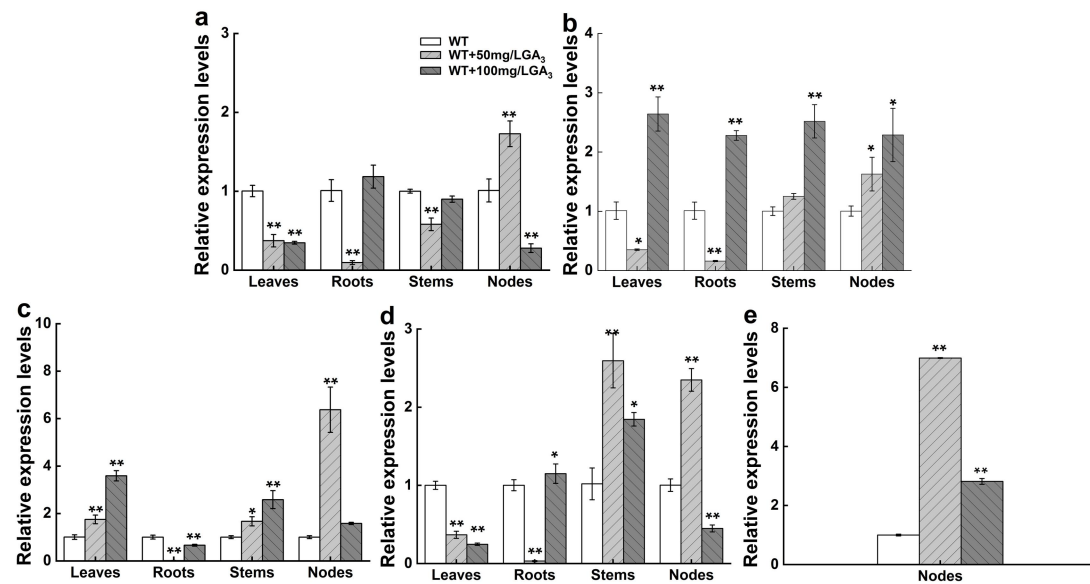

**Figure S1.** The expression of strigolactone genes and TCP transcription factors in the cucumber plants after GA<sub>3</sub> treatment. Cucumber seedlings at the five-leaf stage were treated with 0, 50 and 100 mg/L of GA<sub>3</sub> solution for 12 hours, before analyzing gene expression levels in the roots, leaves, nodes and stems. (a) SL biosynthesis gene *CsCCD7*, (b) SL receptor gene *CsD14*, (c) SL receptor gene *CsDAD2*, (d) *CsTCP2*, (e) *CsTCP18 (CsBRC1)*. Data represent the mean  $\pm$  SD of three biological replicates (Student's t test: \* $P$  < 0.05, \*\* $P$  < 0.01)

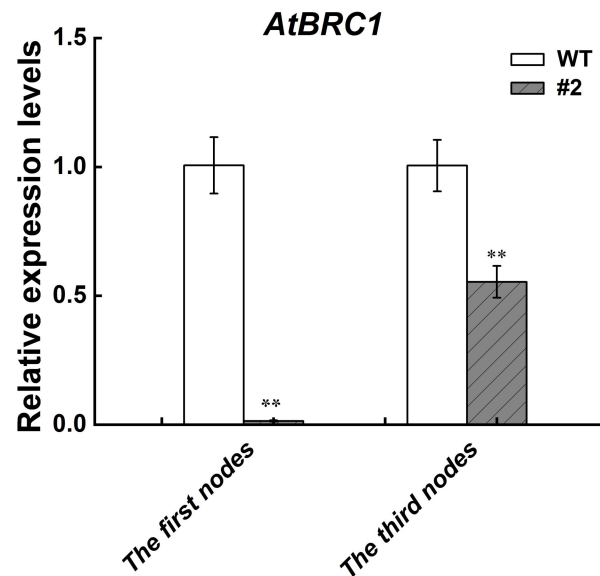

**Figure S2.** Expression of *CsBRC1* in WT and the overexpression of *CsDAD2* in the first and third nodes of *Arabidopsis*. Analysis of the expression of *CsBRC1* in the first nodes and the third nodes of WT and #2. The data represent the mean  $\pm$  SD of three biological replicates (Student's t test: \*\* $P$  < 0.01)

**Table S1** Primer name and sequence

| Gene Name     | Primer Name        | Primer Sequence (5'-3')           |
|---------------|--------------------|-----------------------------------|
| <i>CsDAD2</i> | <i>CsDAD2</i> -CQF | CGGGGTACCATCATCAGTAATAAGAAGAAGAAG |
|               | <i>CsDAD2</i> -CQR | AACTGCAGCCTAACCCAAGATTTCCT        |

**Note:** The *CsDAD2*-CQF transverse line is an *KpnI* enzyme cut site; the *CsDAD2*-CQR transverse line is an *PstI* enzyme cut site

**Table S2** Species and accession numbers of DAD2 and its homologous proteins

| Organism                    | Accession Numbers |
|-----------------------------|-------------------|
| <i>Cucumis sativus</i>      | XP_004148713.1    |
| <i>Benincasa hispida</i>    | XP_038879267.1    |
| <i>Erythranthe guttata</i>  | XP_012846483.1    |
| <i>Tarenaya hassleriana</i> | XP_010532830.1    |
| <i>Medicago truncatula</i>  | XP_013459502.1    |
| <i>Glycine max</i>          | NP_001304372.2    |
| <i>Oryza sativa</i>         | XP_015631400.1    |
| <i>Pisum sativum</i>        | XP_050892745.1    |
| <i>Petunia hybrida</i>      | QSV51912.1        |
| <i>Arabidopsis thaliana</i> | NP_566220         |

**Note:** *CsDAD2* and its homologous proteins from other species were selected to generate a phylogenetic tree with the MEGA 6.0 software, based on the Neighbor-Joining (NJ) method with 1000 bootstrap replication. The accession numbers of DAD2 were listed. Multiple sequence alignment was carried out with the DNAMAN software

**Table S3** Primer sequences used for real-time quantitative PCR

| Gene Name      | Description                                                    | Primer Name       | Primer Sequence (5'-3') |
|----------------|----------------------------------------------------------------|-------------------|-------------------------|
| <i>β-Actin</i> | multifunctional proteins that form microfilaments              | <i>β-Actin</i> -F | AGAAACGGCTACACATC       |
|                |                                                                | <i>β-Actin</i> -R | CCAAGGTCCAACCTACGAG     |
| <i>CsDAD2</i>  | Strigolactones receptor                                        | <i>CsDAD2</i> -F  | AGCGATGGTTCTGGGTCA      |
|                |                                                                | <i>CsDAD2</i> -R  | GCAAGGCAGCCAATAAGG      |
| <i>CsD14</i>   | Strigolactones receptor                                        | <i>CsD14</i> -F   | GATTTCTCCCGTTACACCACT   |
|                |                                                                | <i>CsD14</i> -R   | GGCAAACCCGTTGACCC       |
| <i>CsCCD7</i>  | carotenoid cleavage dioxygenase 7                              | <i>CsCCD7</i> -F  | TTCTGGCACATACTACCT      |
|                |                                                                | <i>CsCCD7</i> -R  | TTTCTTCCCTCCCTTC        |
| <i>CsTCP2</i>  | TEOSINTE BRANCHED 1, cycloidein and PCF transcription factor 2 | <i>CsTCP2</i> -F  | TTTCATTGGCGAGGTCTGC     |
|                |                                                                | <i>CsTCP2</i> -R  | TCGTCCGATTGGTGGTGTTA    |
| <i>CsTCP18</i> | TCP family transcription factor                                | <i>CsTCP18</i> -F | CATTCCATCTTCCCATCTC     |
|                |                                                                | <i>CsTCP18</i> -R | CTACCTTTATCAACACCCAAC   |

**Note:** *CsDAD2* is an SL receptor gene; *CsCCD7* is an SL synthetic gene; *CsTCP2* and *CsTCP18* are TCP family genes

**Table S4** Primer sequences used for real-time quantitative PCR analysis

| Gene name        | Description                                       | Primer name         | Primer sequence (5'-3')      |
|------------------|---------------------------------------------------|---------------------|------------------------------|
| <i>Actin</i>     | multifunctional proteins that form microfilaments | <i>Actin</i> -F     | GAAGATGGCAGACGCTGAGGAT       |
|                  |                                                   | <i>Actin</i> -R     | ACGACCTACAATGCTGGGTAACA<br>C |
| <i>AtGA2ox2</i>  | gibberellin 2-oxidase 2                           | <i>AtGA2ox2</i> -F  | CCTCCTCAATGCTAATCCTCAG       |
|                  |                                                   | <i>AtGA2ox2</i> -R  | TCGGCAACCATCTCCAACA          |
| <i>AtGA2ox6</i>  | gibberellin 2-oxidase 6                           | <i>AtGA2ox6</i> -F  | CGGCGACGAATGATTACA           |
|                  |                                                   | <i>AtGA2ox6</i> -R  | TACGGTGCTGGTGGATAG           |
| <i>AtGA3ox2</i>  | gibberellin 3-oxidase 2                           | <i>AtGA3ox2</i> -F  | GTGGTTTCGCATTAGGTTCA         |
|                  |                                                   | <i>AtGA3ox2</i> -R  | TGGCTCTGTCTGGTTCTG           |
| <i>AtGA20ox1</i> | Fe(II)-dependent oxygenase superfamily protein    | <i>AtGA20ox1</i> -F | GGTGAGAGTGTTGGCTAC           |
|                  |                                                   | <i>AtGA20ox1</i> -R | ACGCATCGCAGAAGTAAT           |
| <i>AtGA20ox2</i> | Fe(II)-dependent oxygenase superfamily protein    | <i>AtGA20ox2</i> -F | TCTTCCTCGTCGTCAATCA          |
|                  |                                                   | <i>AtGA20ox2</i> -R | GCATAGCCACAACCTCTCAC         |
| <i>AtGID1a</i>   | gibberellin receptor<br>GID1A                     | <i>AtGID1a</i> -F   | AGCATCCAGCGTGTAATCC          |
|                  |                                                   | <i>AtGID1a</i> -R   | GCCAACTGCCAATCTCTAATC        |
| <i>AtRGA1</i>    | VHIID/DELLA regulatory family gene                | <i>AtRGA1</i> -F    | GATTGGTGGAGTCATAGGAA         |
|                  |                                                   | <i>AtRGA1</i> -R    | TCTGCTGGATTGCTTCTG           |
| <i>AtRGL1</i>    | VHIID/DELLA regulatory family gene                | <i>AtRGL1</i> -F    | GAGTGATGTCGGAGTTATTC         |
|                  |                                                   | <i>AtRGL1</i> -R    | ATGCTTGCTTGCTTATACG          |
| <i>AtSLY1</i>    | F-box family protein                              | <i>AtSLY1</i> -F    | TCTAGTGTACGAGGTGTTGAA        |
|                  |                                                   | <i>AtSLY1</i> -R    | GCCGATGTTAGTCCAGTGA          |
| <i>AtBRC1</i>    | TCP family transcription factor.                  | <i>AtBRC1</i> -F    | CCGTTGAATGGTTGCTTACA         |
|                  |                                                   | <i>AtBRC1</i> -R    | GTTAGTATTGCTGCCTCTATCG       |
| <i>AtCCD7</i>    | carotenoid cleavage dioxygenase 7                 | <i>AtCCD7</i> -F    | TGGCGACGACAACTACTCC          |
|                  |                                                   | <i>AtCCD7</i> -R    | TGTTCCACCCGTTTAGAGGC         |
| <i>AtCCD8</i>    | carotenoid cleavage dioxygenase 8                 | <i>AtCCD8</i> -F    | TGATGCTGCACATATCCATCG        |
|                  |                                                   | <i>AtCCD8</i> -R    | GTTTTACCCGATGCTAGGATC        |
| <i>AtD14</i>     | Strigolactones receptor                           | <i>AtD14</i> -F     | ACGGCGAAGGATGTTTCTGT         |
|                  |                                                   | <i>AtD14</i> -R     | CTAAGCTGCGCAAATGTCC          |

**Note:** *AtGA2ox2* and *AtGA2ox6* are GA degradation genes; *AtGA20ox1*, *AtGA20ox2* and *AtGA3ox2* are GA synthetic genes; *AtGID1a*, *AtRGA1*, *AtRGL1* and *AtSLY1* are GA signaling genes; *AtBRC1* is a branch inhibitory gene; *AtCCD7* and *AtCCD8* are SL biosynthesis gene; *AtD14* is an SL receptor gene
